# Supplementary material for: Characterization and Biomarker Analyses of Post-COVID-19 Complications and Neurological Manifestations
Source: PubMed Central journal article supplement (PMC7918597; doi:10.3390/cells10020386), 2021-02-13
Supplement: cells-10-00386-s001.pdf [file cells-10-00386-s001.pdf]

Supplementary Material

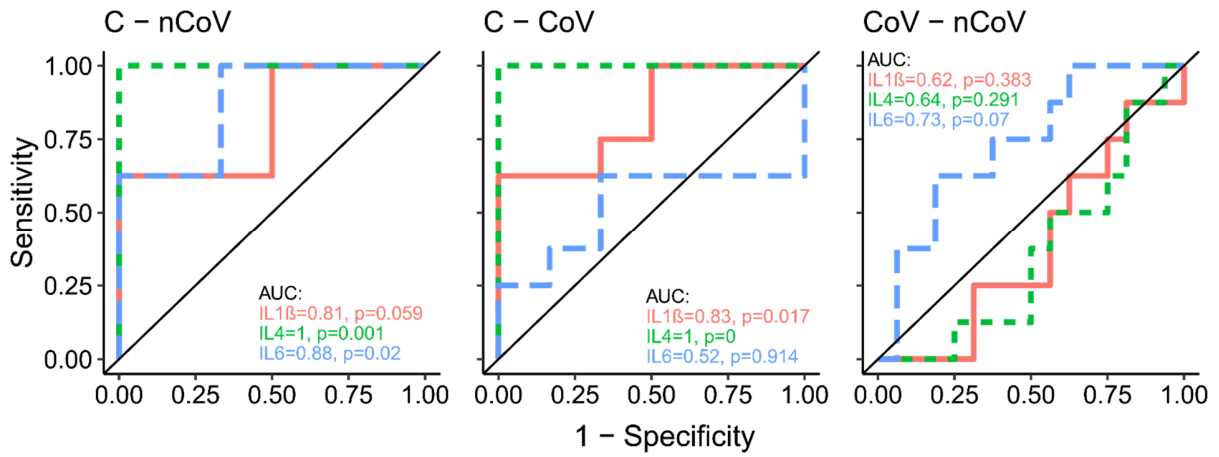

**Figure S1.** Receiver-Operator curves for significantly differentially expressed plasma cytokines. Area under curve (AUC) are shown in the graphs with one-sample Wilcoxon rank sum exact tests. Cytokines found significant or trending up in Figure 1A are displayed as following, IL1 $\beta$  (solid pink line), IL4 (green dotted line) and IL6 (blue dashed line) for each pair of groups.

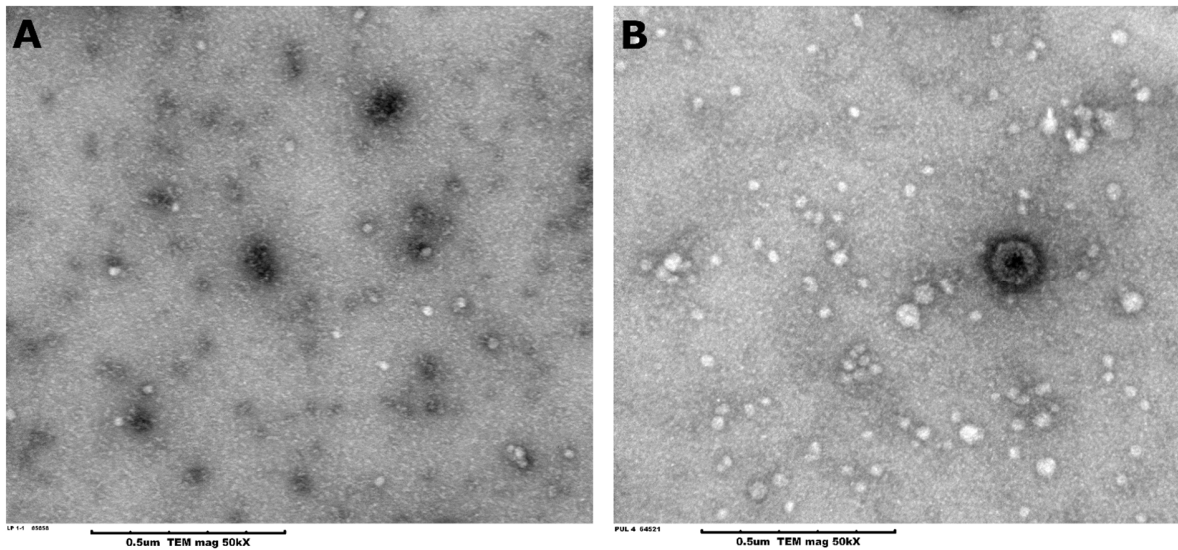

**Figure S2.** Transmission electronic microscopy of nEVs from plasma. The control nEVs are homogeneous (A) while the nEVs from the CoV (not shown) and nCoV (pictured) groups are heterogenous in size (B).
